volutrauma are required to obtain a solid method for the early detection of inflammation following volutrauma.

### Competing Interests

The authors declare no competing interests.

**Ata Mahmoodpoor, M.D., F.C.C.M., Samad E. J. Golzari, M.D.** Tabriz University of Medical Sciences, Tabriz, Iran (S.E.J.G.). dr.golzari@hotmail.com

### References

1. Fernandez-Bustamante A, Klawitter J, Repine JE, Agazio A, Janocha AJ, Shah C, Moss M, Douglas IS, Tran ZV, Erzurum SC, Christians U, Seres T: Early effect of tidal volume on lung injury biomarkers in surgical patients with healthy lungs. *ANESTHESIOLOGY* 2014; 121:469–81
2. Wrigge H, Uhlig U, Zinserling J, Behrends-Callsen E, Ottersbach G, Fischer M, Uhlig S, Putensen C: The effects of different ventilatory settings on pulmonary and systemic inflammatory responses during major surgery. *Anesth Analg* 2004; 98:775–81
3. Wrigge H, Zinserling J, Stüber F, von Spiegel T, Hering R, Wetegrove S, Hoeft A, Putensen C: Effects of mechanical ventilation on release of cytokines into systemic circulation in patients with normal pulmonary function. *ANESTHESIOLOGY* 2000; 93:1413–7
4. Michelet P, D'Journo XB, Roch A, Doddoli C, Marin V, Papazian L, Decamps I, Bregeon F, Thomas P, Auffray JP: Protective ventilation influences systemic inflammation after esophagectomy: A randomized controlled study. *ANESTHESIOLOGY* 2006; 105:911–9
5. Wrigge H, Uhlig U, Baumgarten G, Menzenbach J, Zinserling J, Ernst M, Drömann D, Welz A, Uhlig S, Putensen C: Mechanical ventilation strategies and inflammatory responses to cardiac surgery: A prospective randomized clinical trial. *Intensive Care Med* 2005; 31:1379–87
6. Schilling T, Kozian A, Huth C, Bühling F, Kretzschmar M, Welte T, Hachenberg T: The pulmonary immune effects of mechanical ventilation in patients undergoing thoracic surgery. *Anesth Analg* 2005; 101:957–65
7. Dannevig I, Solevåg AL, Saugstad OD, Nakstad B: Lung injury in asphyxiated newborn pigs resuscitated from cardiac arrest: The impact of supplementary oxygen, longer ventilation intervals and chest compressions at different compression-to-ventilation ratios. *Open Respir Med J* 2012; 6:89–96

(Accepted for publication January 20, 2015.)

### In Reply:

We thank Dr. Mahmoodpoor and Dr. Golzari for their interest in our work<sup>1</sup> on the early detection of lung injury related to volutrauma during mechanical ventilation. They highlight the limitations of the short time course of ventilation in our study and the analysis of volutrauma-related biomarkers in blood. Although 60 min of mechanical ventilation is certainly a short period of time, this time frame is supported by previously reported significant increases in blood of interleukin (IL)-1 receptor antagonist, IL-6, IL-10, and tumor necrosis factor within 60 min of initiation of large tidal volume ventilation in adults<sup>2</sup> and of tumor necrosis factor- $\alpha$ , IL-1 $\beta$ , and IL-6 within 15 min after recruitment maneuvers in children.<sup>3</sup> Prior studies have also shown changes in neutrophil elastase and Clara Cell protein 16 plasma levels within 1 to 3 h of ventilation in animal models<sup>4,5</sup> and humans.<sup>6</sup> Blood measurements of the

latter biomarkers have been extensively used in the literature of lung injury because of their reliable lung source.<sup>7–9</sup> In our healthy surgical patients, we have shown that tidal volume differentially affects plasma levels of neutrophil elastase and Clara Cell 16. We believe that these data can be used as a reference for future studies. Similarly, although bronchoalveolar lavage fluid may better reflect lung inflammation, its serial collection is not devoid of risks and interpretation challenges that make it suboptimal for healthy surgical patients. We pursued these analyses in exhaled breath condensate samples, a technique that poses its specific challenges but is noninvasive, repeatable, and safe. Our understanding of the early development of ventilation-mediated lung injury in patients is incomplete, and developing safe and clinically relevant plasma and exhaled breath condensate surrogates is a rational strategy.

### Competing Interests

The authors declare no competing interests.

**Ana Fernandez-Bustamante, M.D., Ph.D., Tamas Seres, M.D.** University of Colorado School of Medicine, Aurora, Colorado (A.F.-B.). ana.fernandez-bustamante@ucdenver.edu

### References

1. Fernandez-Bustamante A, Klawitter J, Repine JE, Agazio A, Janocha AJ, Shah C, Moss M, Douglas IS, Tran ZV, Erzurum SC, Christians U, Seres T: Early effect of tidal volume on lung injury biomarkers in surgical patients with healthy lungs. *ANESTHESIOLOGY* 2014; 121:469–81
2. Stüber F, Wrigge H, Schroeder S, Wetegrove S, Zinserling J, Hoeft A, Putensen C: Kinetic and reversibility of mechanical ventilation-associated pulmonary and systemic inflammatory response in patients with acute lung injury. *Intensive Care Med* 2002; 28:834–41
3. Halbertsma FJ, Vaneker M, Pickkers P, Neeleman C, Scheffer GJ, Hoeven van der JG: A single recruitment maneuver in ventilated critically ill children can translocate pulmonary cytokines into the circulation. *J Crit Care* 2010; 25:10–5
4. Kaynar AM, Houghton AM, Lum EH, Pitt BR, Shapiro SD: Neutrophil elastase is needed for neutrophil emigration into lungs in ventilator-induced lung injury. *Am J Respir Cell Mol Biol* 2008; 39:53–60
5. Lesur O, Hermans C, Chalifour JF, Picotte J, Lévy B, Bernard A, Lane D: Mechanical ventilation-induced pneumoprotein CC-16 vascular transfer in rats: Effect of KGF pretreatment. *Am J Physiol Lung Cell Mol Physiol* 2003; 284:L410–9
6. Sarafidis K, Stathopoulou T, Diamanti E, Soubasi V, Agakidis C, Balaska A, Drossou V: Clara cell secretory protein (CC16) as a peripheral blood biomarker of lung injury in ventilated preterm neonates. *Eur J Pediatr* 2008; 167:1297–303
7. Kodama T, Yukioka H, Kato T, Kato N, Hato F, Kitagawa S: Neutrophil elastase as a predicting factor for development of acute lung injury. *Intern Med* 2007; 46:699–704
8. Wang Z, Chen F, Zhai R, Zhang L, Su L, Lin X, Thompson T, Christiani DC: Plasma neutrophil elastase and elafin imbalance is associated with acute respiratory distress syndrome (ARDS) development. *PLoS One* 2009; 4:e4380
9. Broeckaert F, Clippe A, Knoop B, Hermans C, Bernard A: Clara cell secretory protein (CC16): Features as a peripheral lung biomarker. *Ann N Y Acad Sci* 2000; 923:68–77

(Accepted for publication January 20, 2015.)
